# Supplementary material for: Medication-Related Complaints in Residential Aged Care
Source: MDPI journal article supplement (doi:10.3390/pharmacy11020063), 2023-03-23
Supplement: s1 [file s1]

## **The six rights of medicine administration**

- 1 Right consumer
- 2 Right medicine
- 3 Right dose
- 4 Right time
- 5 Right route
- 6 Right documentation

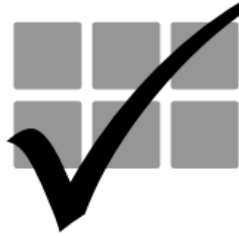

**Supplementary Figure S1.** Six rights of medication administration [19].
