# Supplementary material for: Medication-Related Complaints in Residential Aged Care
Source: MDPI journal article supplement (doi:10.3390/pharmacy11020063), 2023-03-23
Supplement: s1 [file s1]

**Supplementary Table S1: Questions asked when lodging a Complaint**

| No. | Question                                                                                                                                                                                                                                                                                                                                                                                                                           |
|-----|------------------------------------------------------------------------------------------------------------------------------------------------------------------------------------------------------------------------------------------------------------------------------------------------------------------------------------------------------------------------------------------------------------------------------------|
| 1   | What type of complaint would you like to submit? (open/confidential/anonymous)                                                                                                                                                                                                                                                                                                                                                     |
| 2   | Have you signed the notice of collection which explains how the Commission will use personal information collected?                                                                                                                                                                                                                                                                                                                |
| 3   | What is your name and address? (only if an open or confidential complaint)                                                                                                                                                                                                                                                                                                                                                         |
| 4   | Do you want us to call or email you about your complaint? (only if an open or confidential complaint)                                                                                                                                                                                                                                                                                                                              |
| 5   | My complaint relates to; a) the care or services I am receiving; or b) the care or services someone else is receiving.                                                                                                                                                                                                                                                                                                             |
| 6   | Details of person receiving care (only if an open or confidential complaint)                                                                                                                                                                                                                                                                                                                                                       |
| 7   | Address of person receiving care (only if an open or confidential complaint)                                                                                                                                                                                                                                                                                                                                                       |
| 8   | If you are lodging this complaint on behalf of someone else what is your relationship with the person receiving care?                                                                                                                                                                                                                                                                                                              |
| 9   | If you are lodging this complaint on behalf of someone else is the person receiving care aware of this complaint?                                                                                                                                                                                                                                                                                                                  |
| 10  | If you are lodging this complaint on behalf of someone else, are you authorised to make decisions on behalf of the person receiving care?                                                                                                                                                                                                                                                                                          |
| 11  | What type of aged care service does the complaint or information relate to?<br>a. residential aged care   b. home care                                                                                                                                                                                                                                                                                                             |
| 12  | Name of service?                                                                                                                                                                                                                                                                                                                                                                                                                   |
| 13  | What does your complaint relate to?<br>a. Abuse   b. Choice and Dignity   c. Client Assessment and Service   d. Consultation and Communication   e. COVID   f. Financial   g. Food and Catering   h. Goods and Equipment   i. Health Care   j. Infection control   k. Personal Care   l. Personal Property   m. Physical Environment   n. Respite   o. Social and Domestic Assistance   p. Termination of agreement or   q. Other. |
| 14  | Tell us more details about your complaint?                                                                                                                                                                                                                                                                                                                                                                                         |
| 15  | If available, upload supporting information about your complaint                                                                                                                                                                                                                                                                                                                                                                   |
| 16  | Have you raised your complaint directly with the service or someone else?                                                                                                                                                                                                                                                                                                                                                          |
| 17  | Would you like to be involved in the resolution process? (only if an open or confidential complaint)                                                                                                                                                                                                                                                                                                                               |
| 18  | Would you like feedback on the resolution of this complaint? (only if an open or confidential complaint)                                                                                                                                                                                                                                                                                                                           |
| 19  | Would you like the service provider to contact you directly about your concerns? (only if an open or confidential complaint)                                                                                                                                                                                                                                                                                                       |
| 20  | What outcome would you like from this complaint?                                                                                                                                                                                                                                                                                                                                                                                   |

**Supplementary Table S2.** NCCIMS keywords and sub-keywords included in dataset extract

| Keyword                                  | Sub-Keyword                                |
|------------------------------------------|--------------------------------------------|
| Abuse                                    | Physical                                   |
|                                          | Psychological/emotional                    |
| Choice and Dignity                       | Right to refuse medication                 |
| Client assessment/Service implementation | Polypharmacy review                        |
| Consultation and communication           | Ability to express needs/wants             |
|                                          | Information about medication               |
| Goods and equipment                      | Medical and pharmaceutical supplies        |
|                                          | Allied health assessment and services      |
|                                          | Chemical restraint                         |
| Health Care                              | Constipation and continence management     |
|                                          | Dementia management                        |
|                                          | Falls prevention and post falls management |
|                                          | Infectious diseases and infection control  |
|                                          | Medication administration and management   |
|                                          | Pain management                            |
|                                          | Palliative/end of life care                |
|                                          | Physical restraint                         |
|                                          | Behaviour management                       |
|                                          | Mental health                              |
| Personal care                            | Personal safety & interventions            |
|                                          | Sleep                                      |
